# Supplementary material for: microRNA-129-5p shuttled by mesenchymal stem cell-derived extracellular vesicles alleviates intervertebral disc degeneration via blockade of LRG1-mediated p38 MAPK activation
Source: PubMed Central journal article supplement — J Tissue Eng. 2021 Jul 29;12:20417314211021679. doi: 10.1177/20417314211021679 (PMC8330460; doi:10.1177/20417314211021679), 2021-07-29
Supplement: sj-pdf-6-tej-10.1177_20417314211021679.pdf [file sj-pdf-6-tej-10.1177_20417314211021679.pdf]

fig1C :

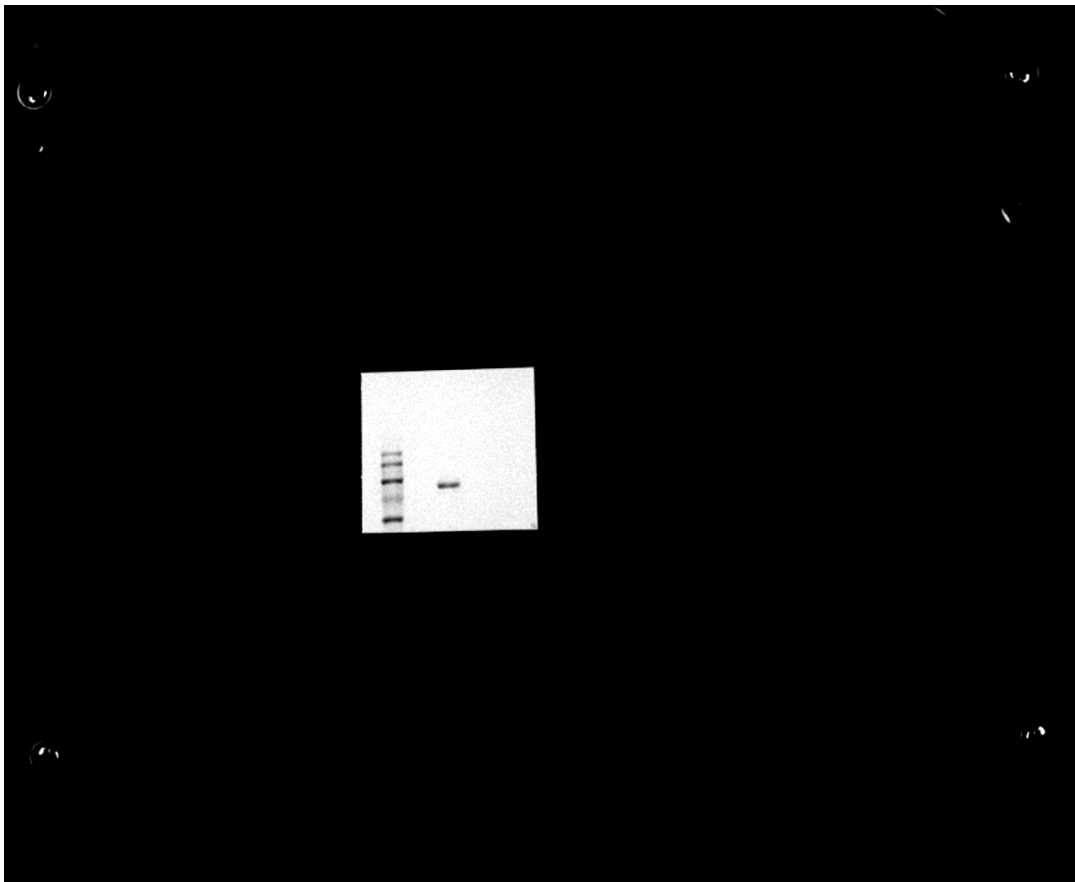

Calnexin

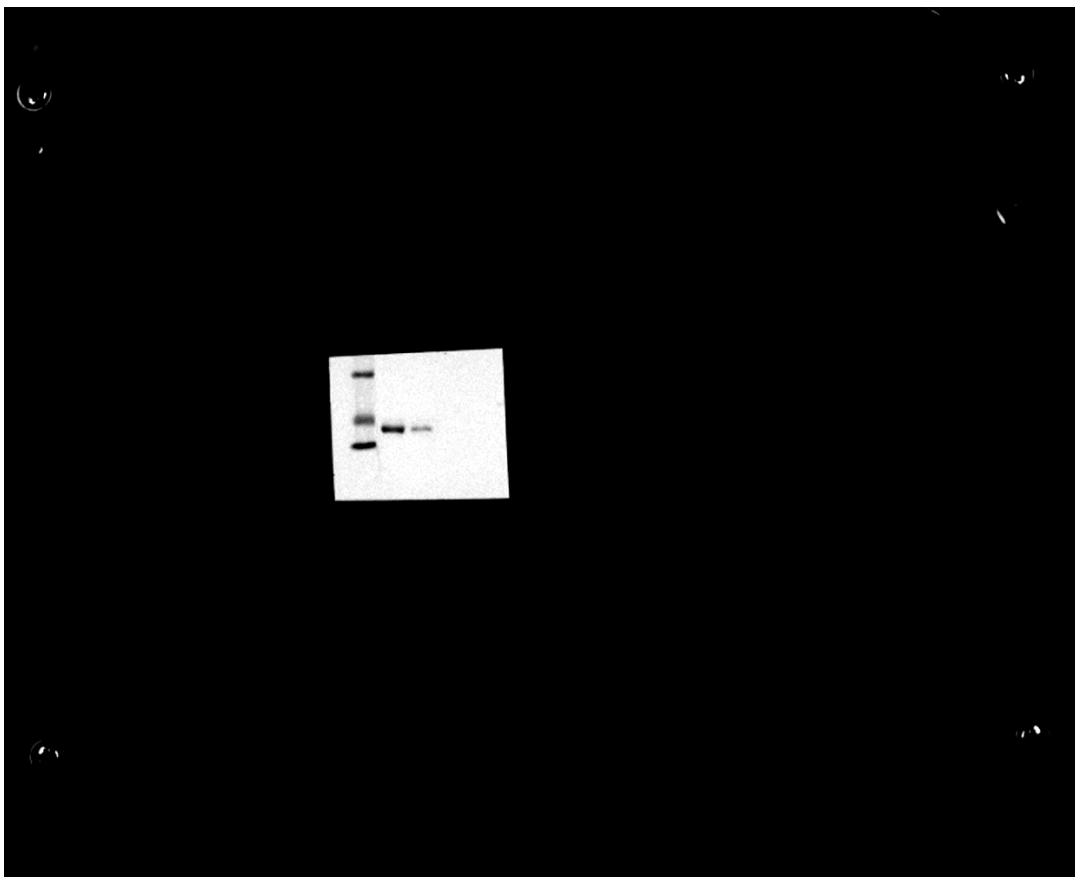

CD9

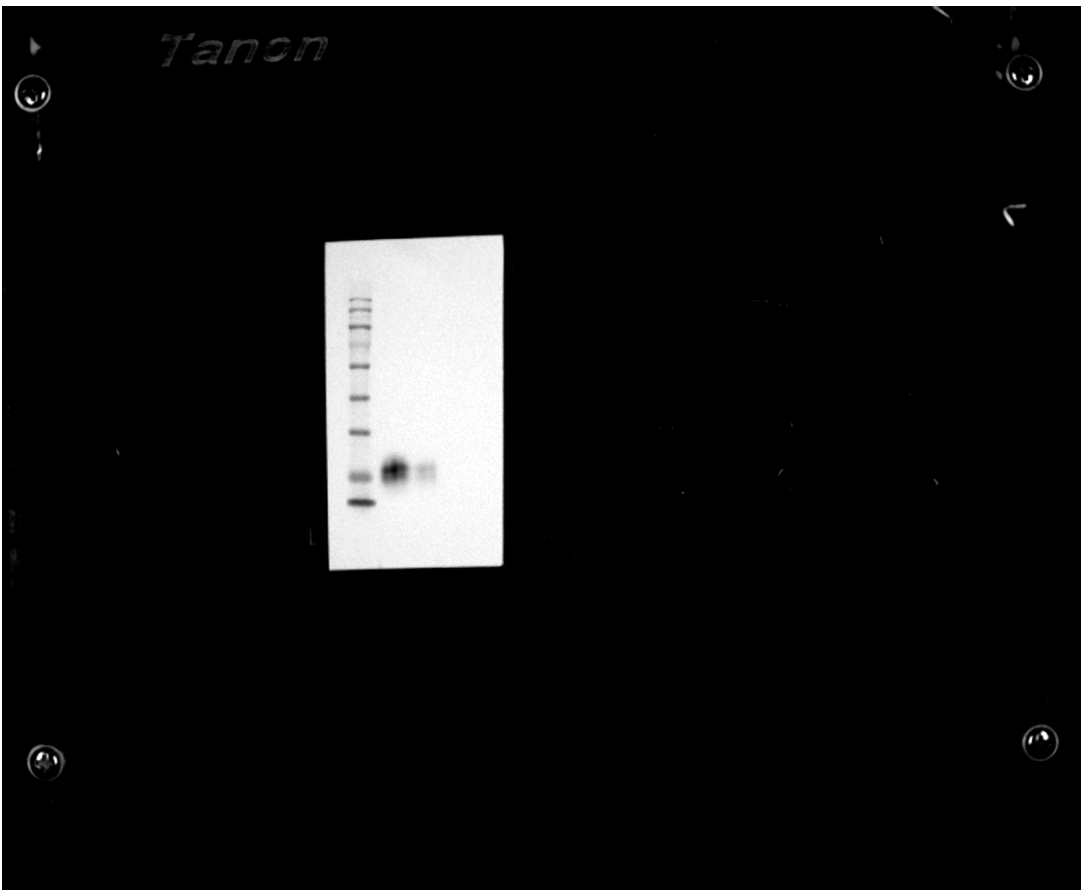

CD63

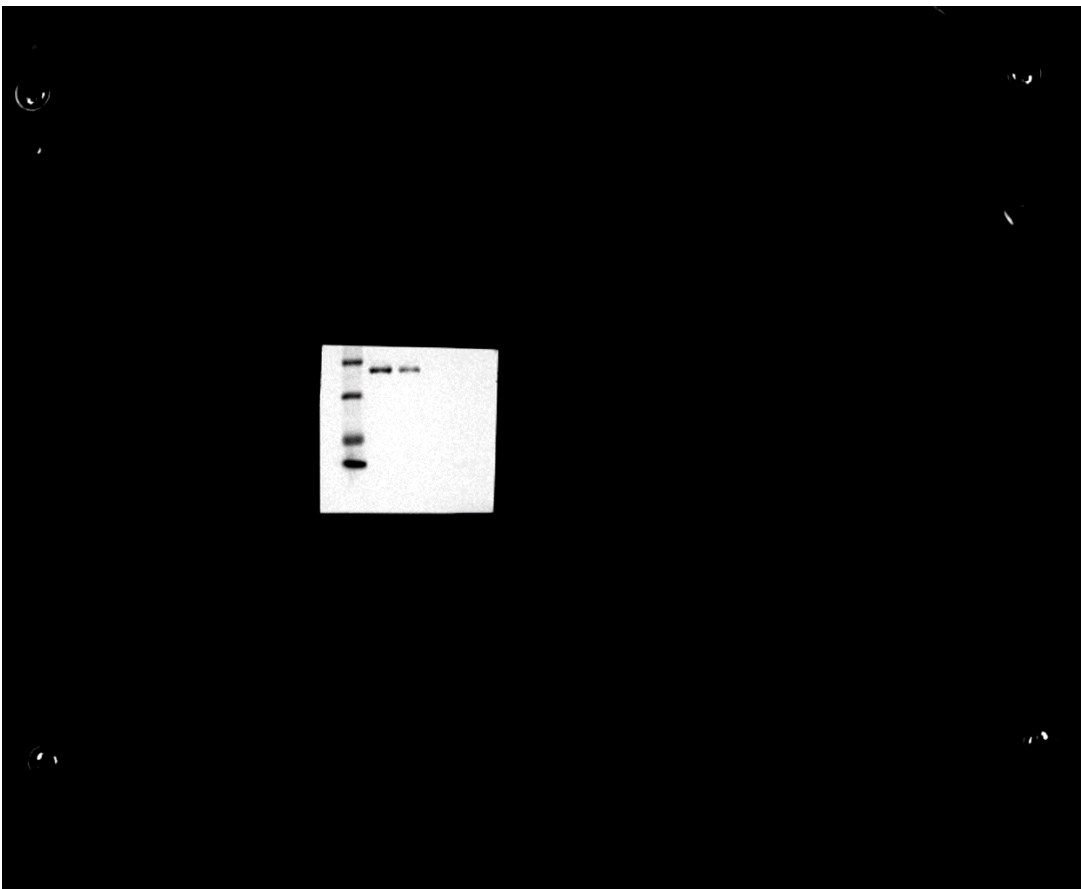

TSG101

fig3G :

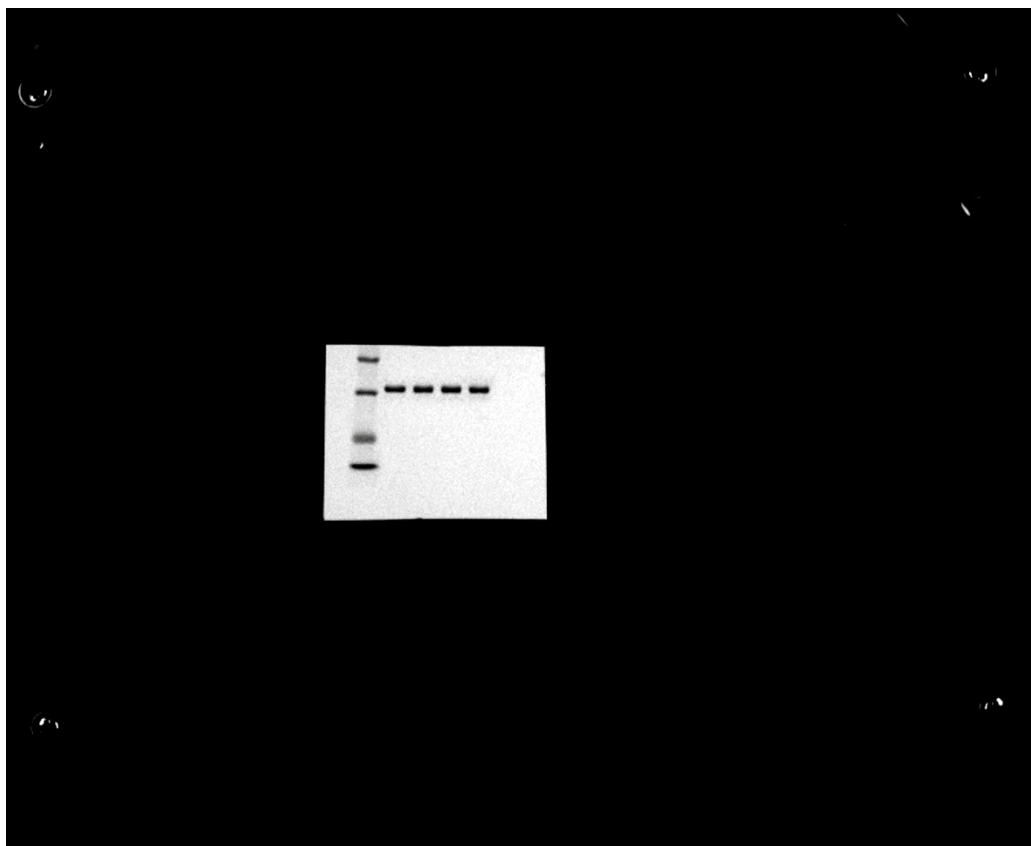

GAPDH

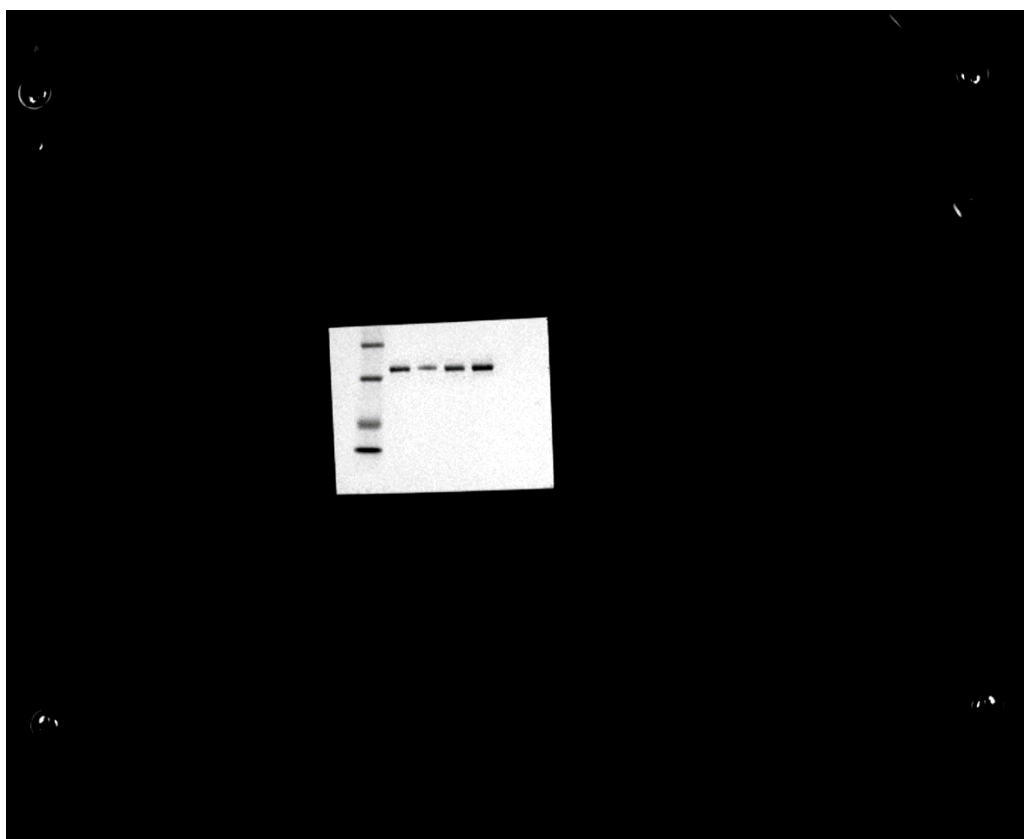

LRG1

fig5C :

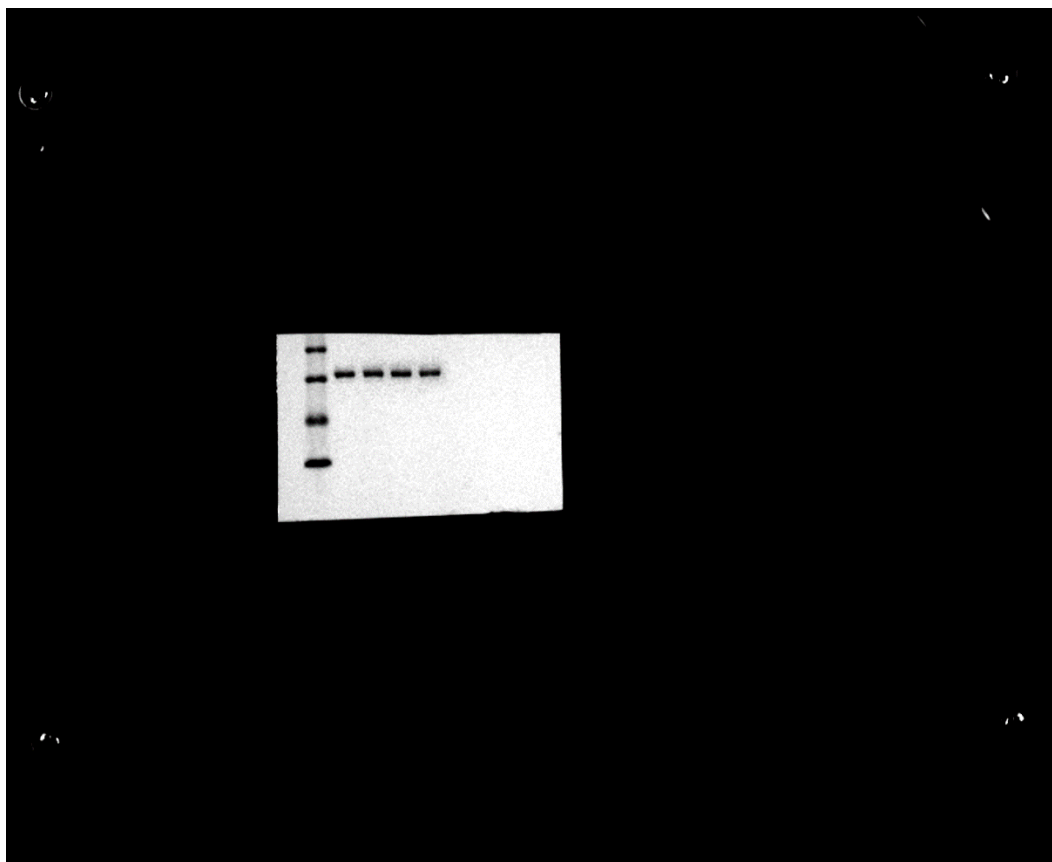

GAPDH

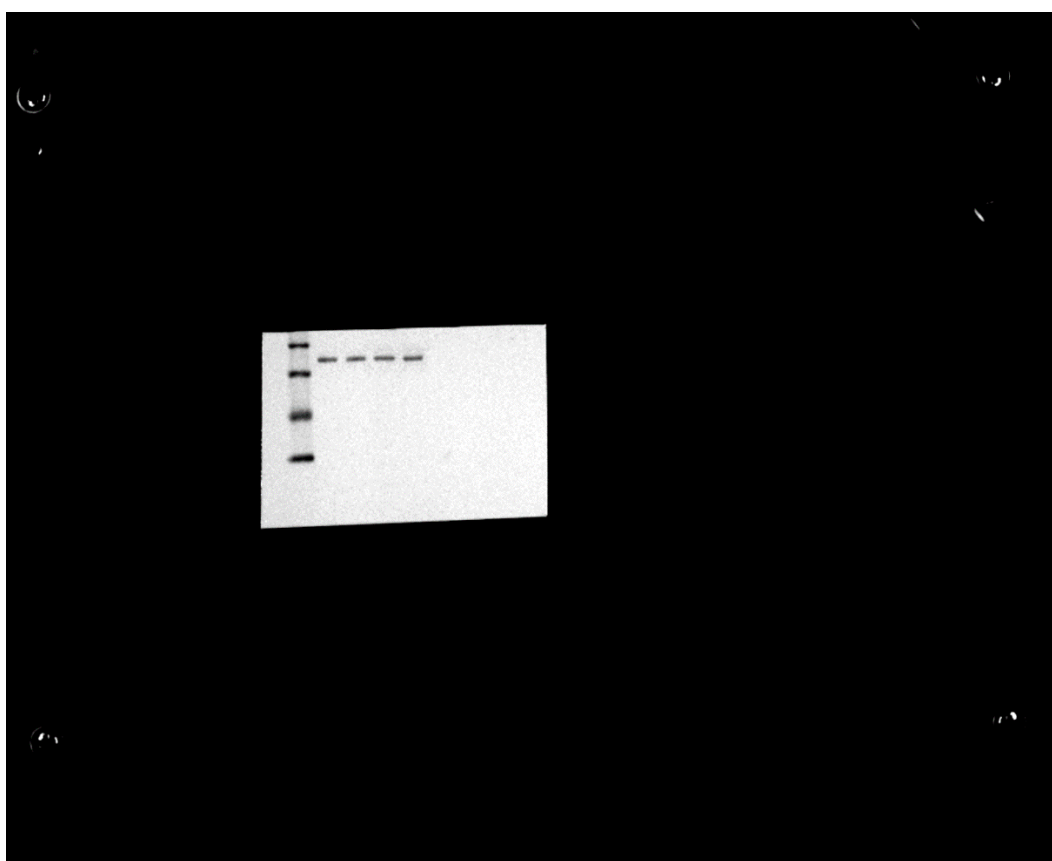

p38

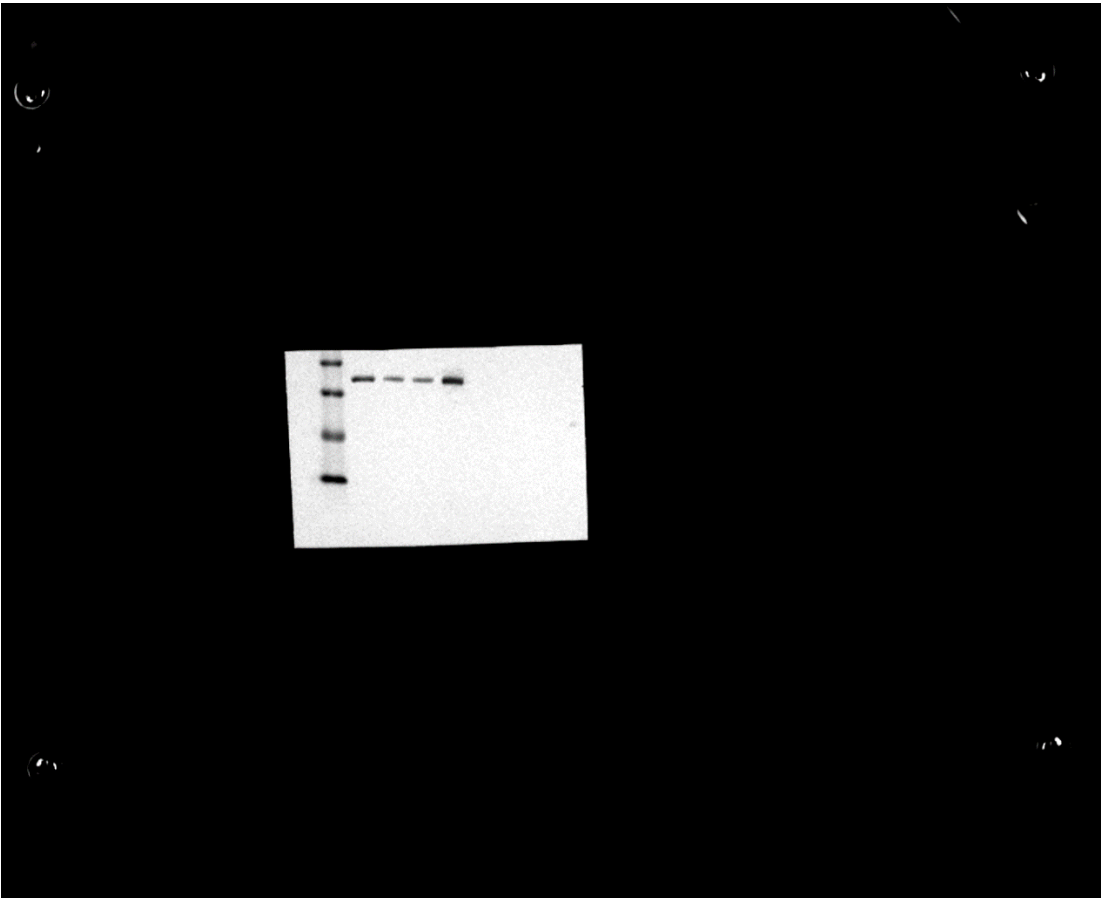

Figure S1C :

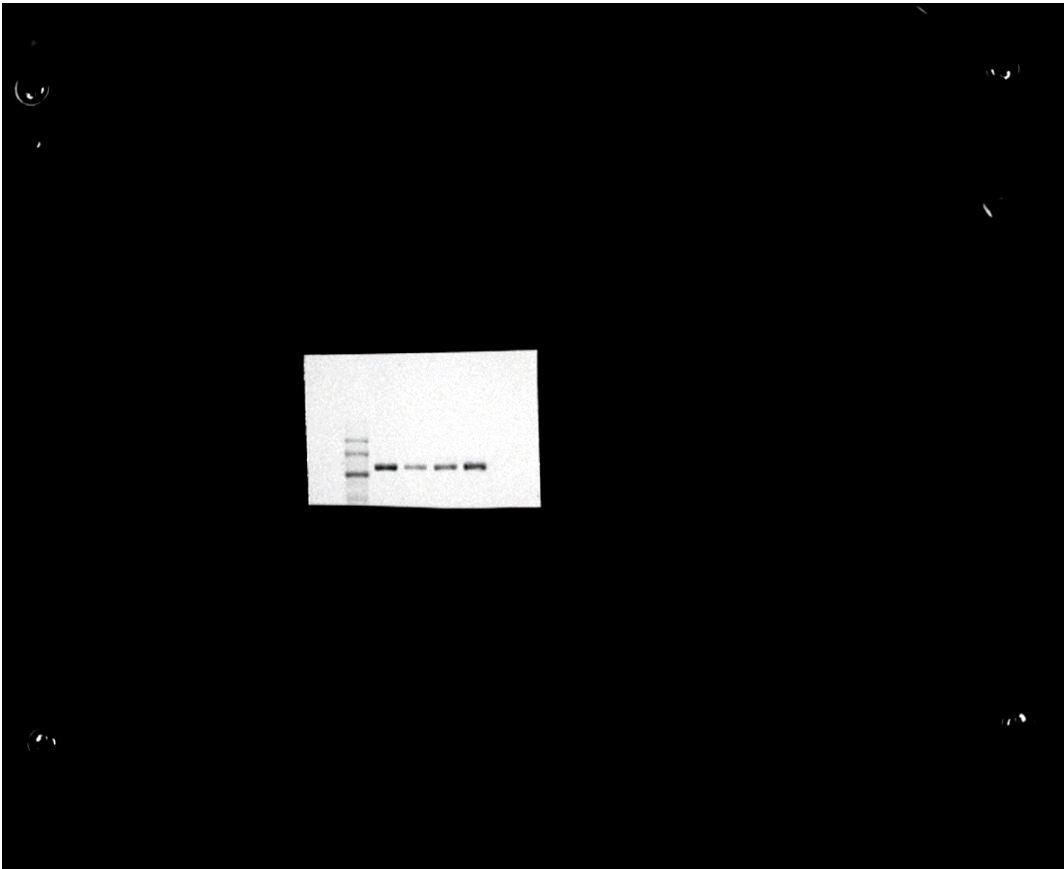

aggrecan

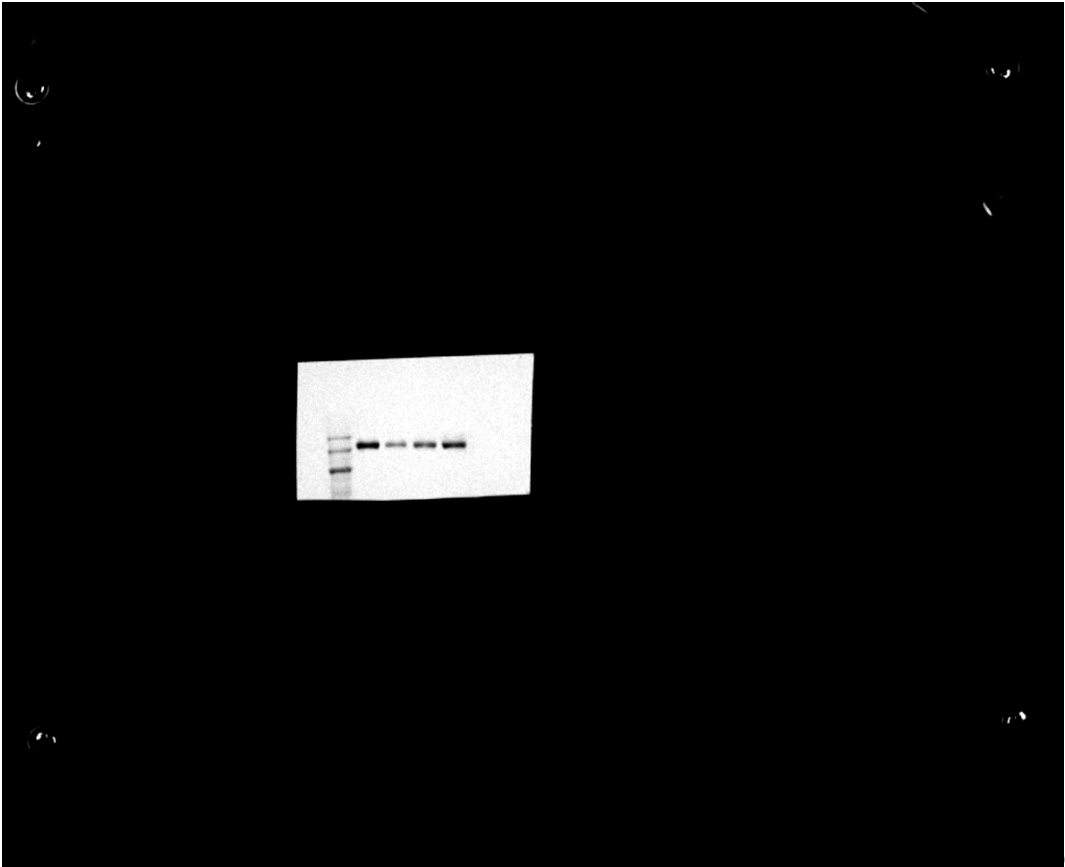

collagen II

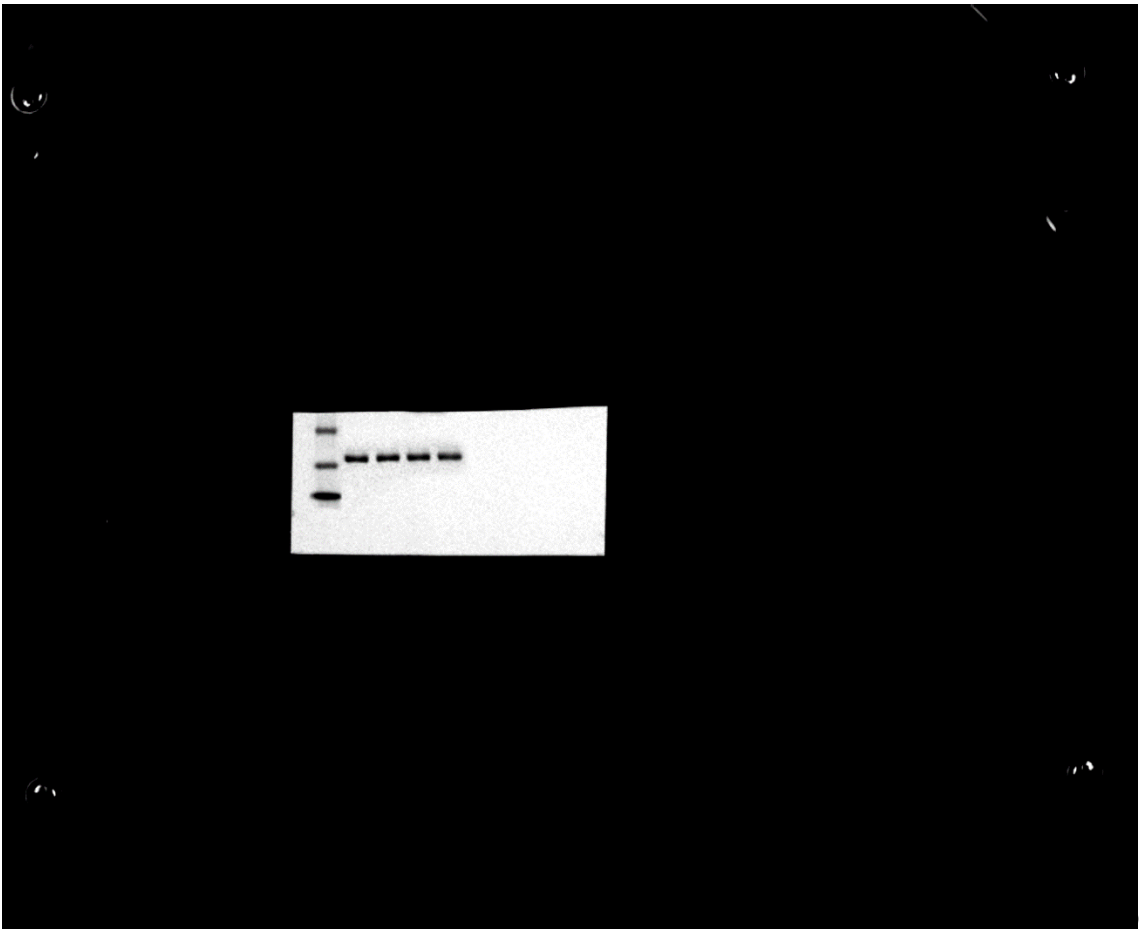

GAPDH

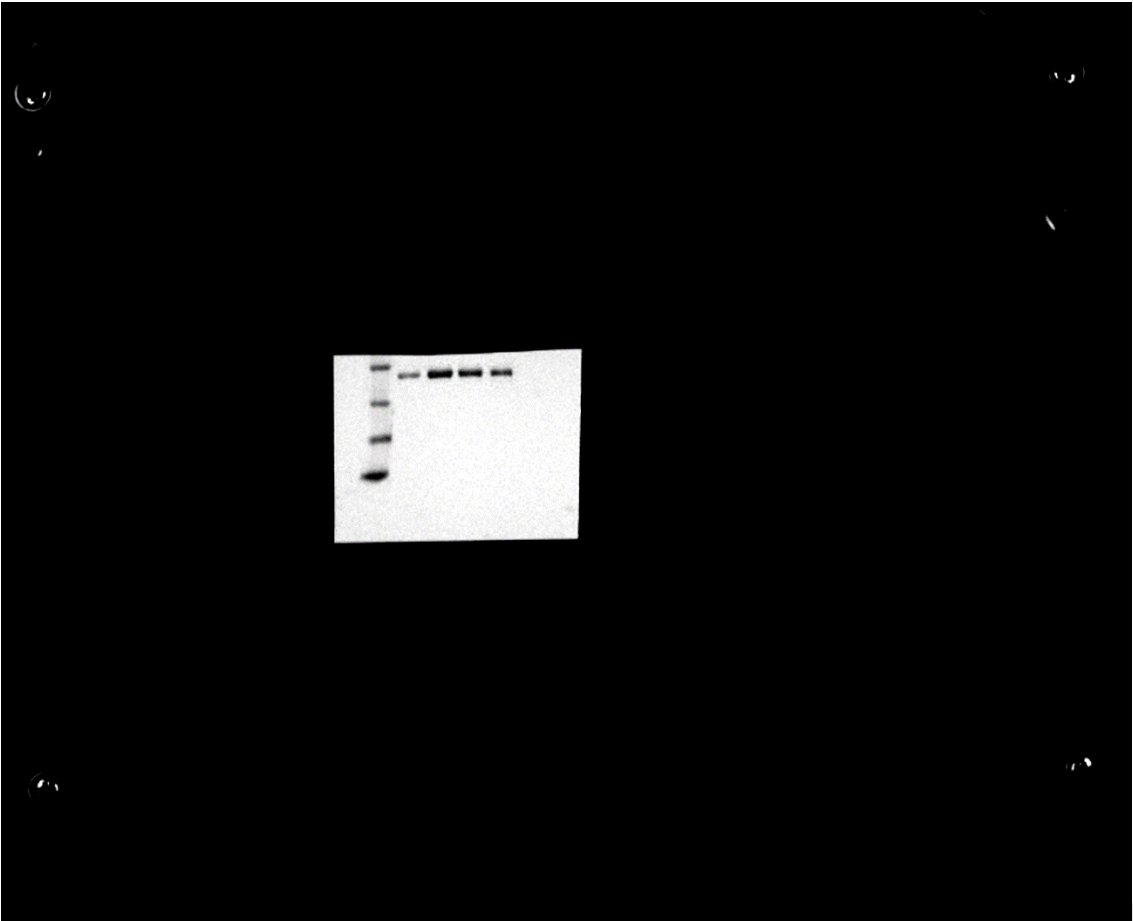

MMP3

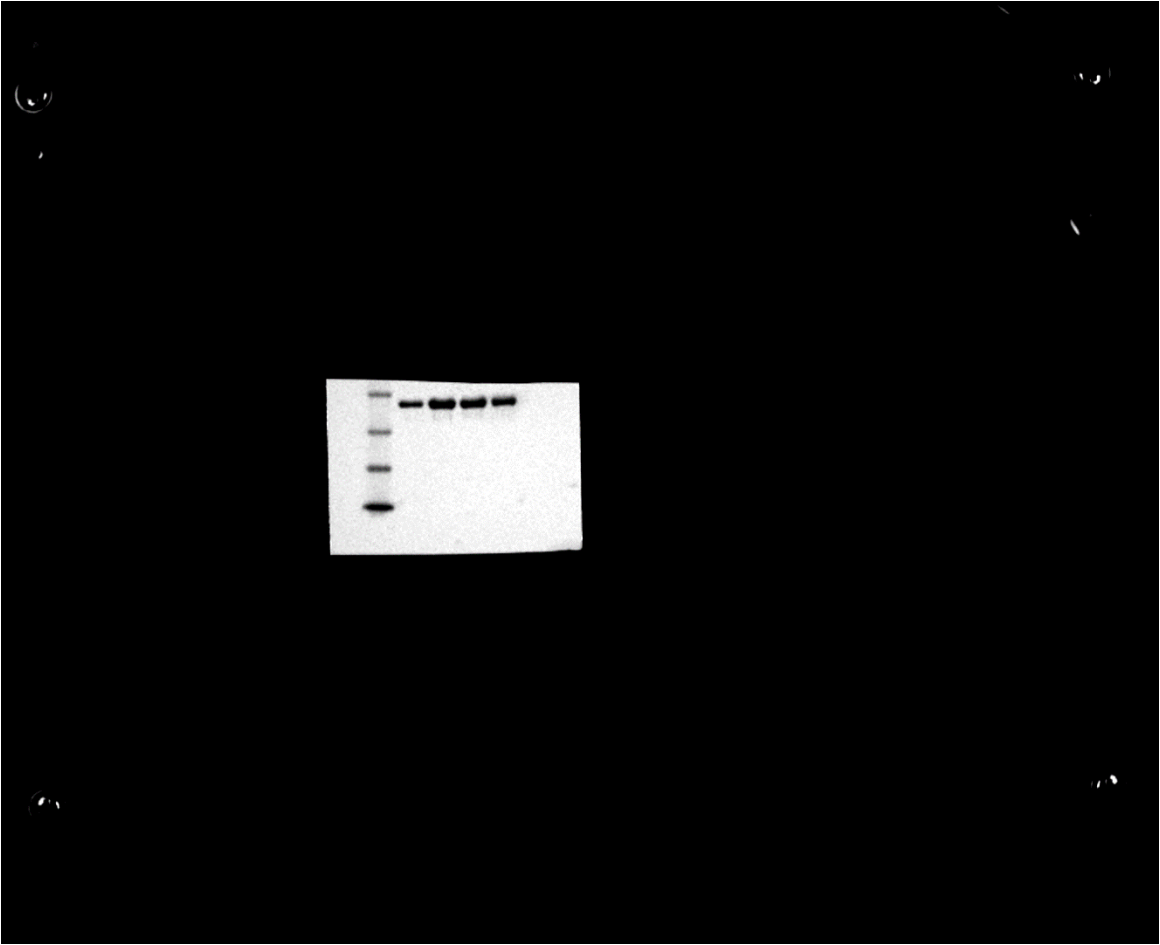

MMP13



Figure S2B :

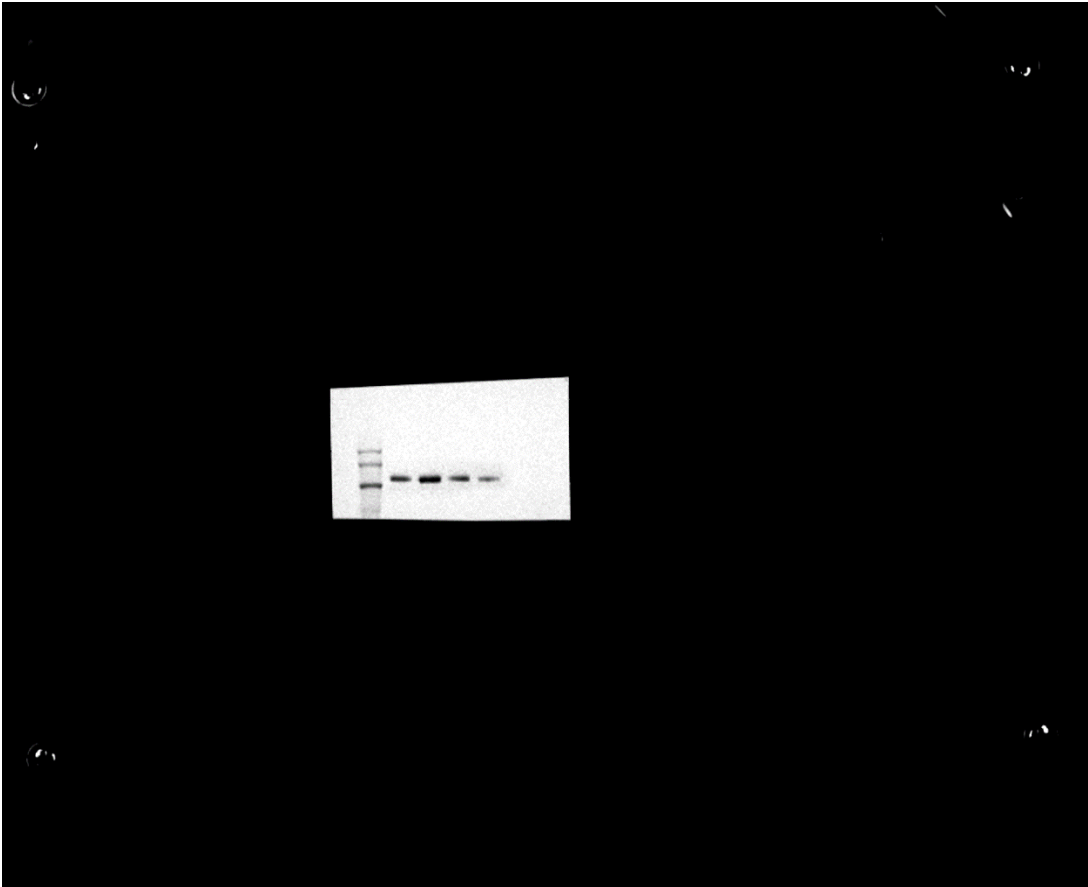

aggrecan

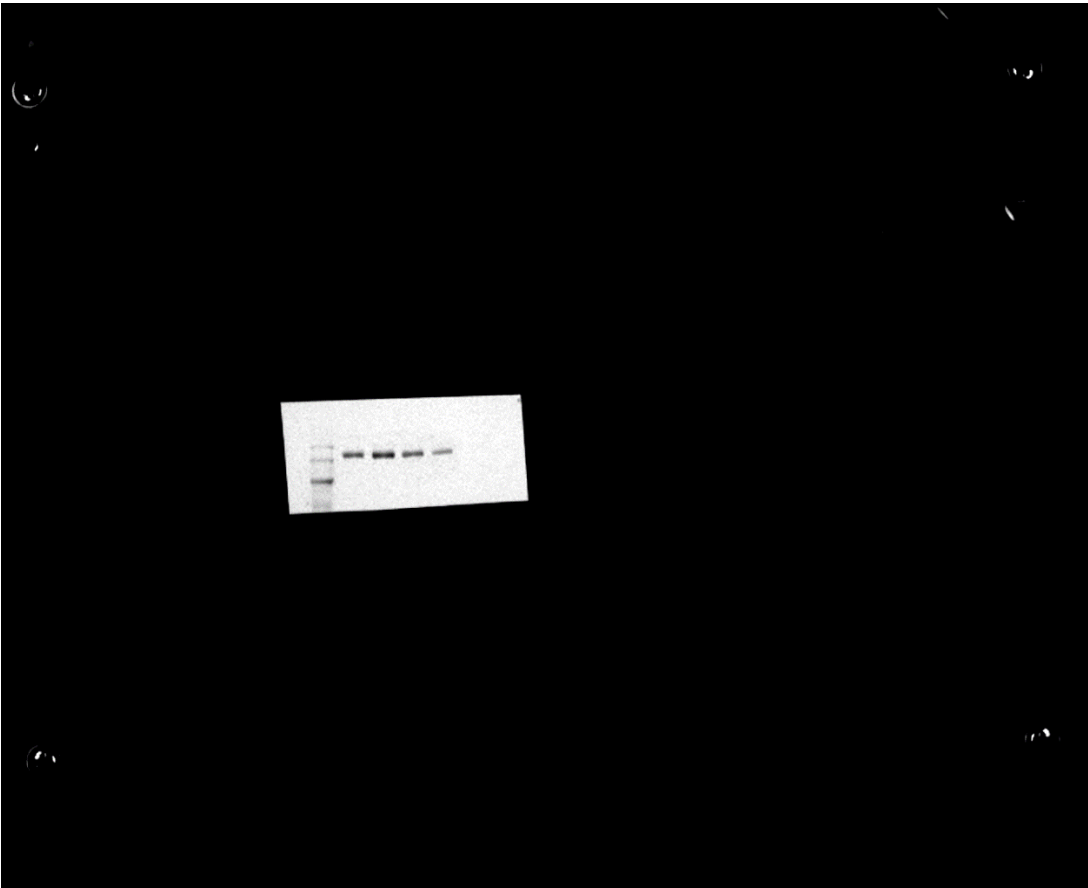

collagen II

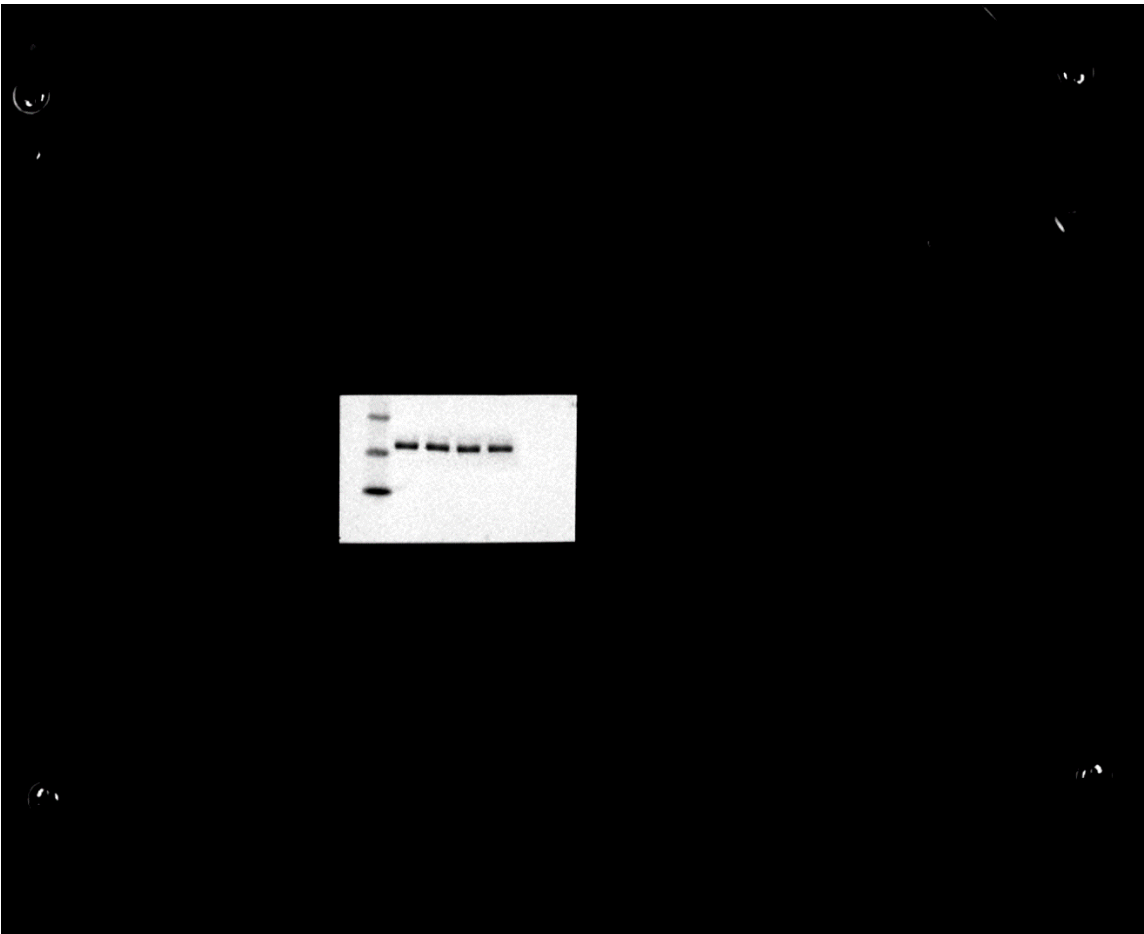

GAPDH

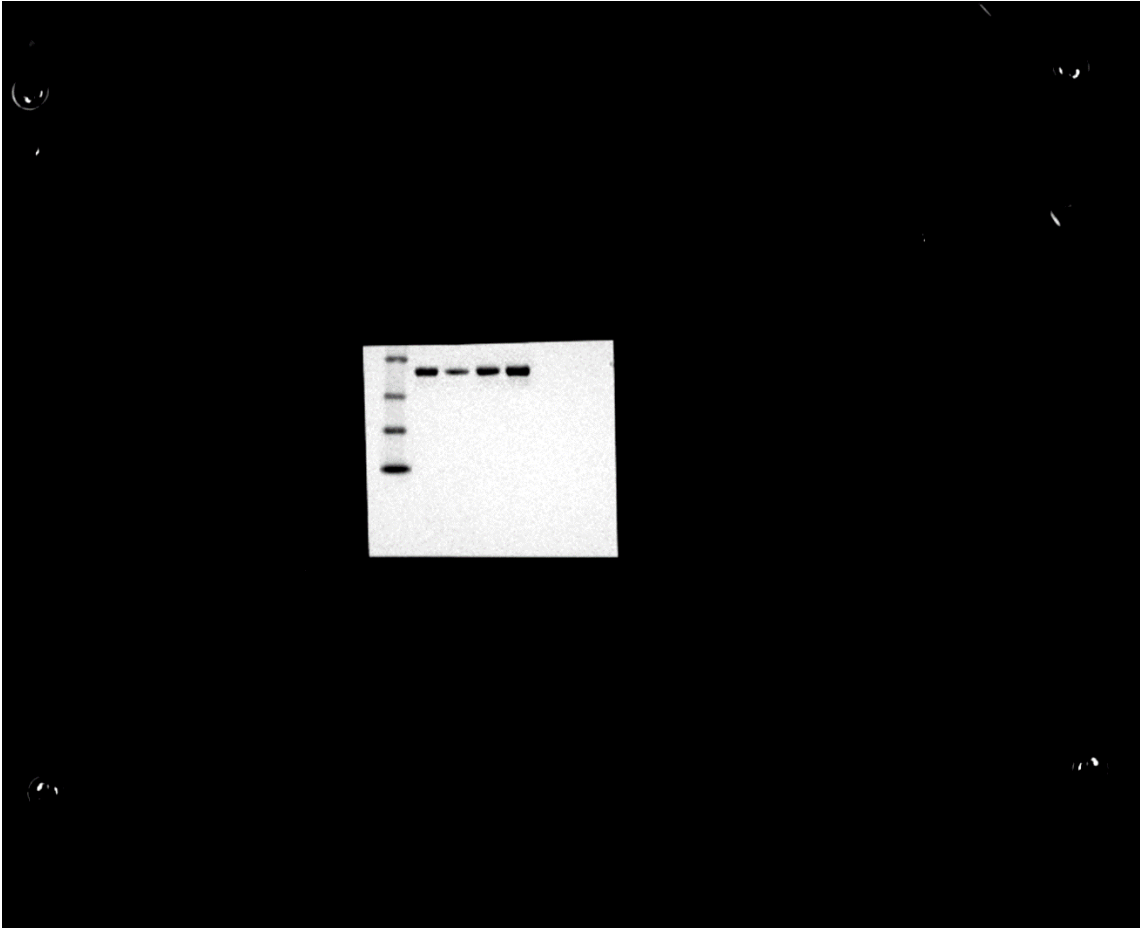

MMP3

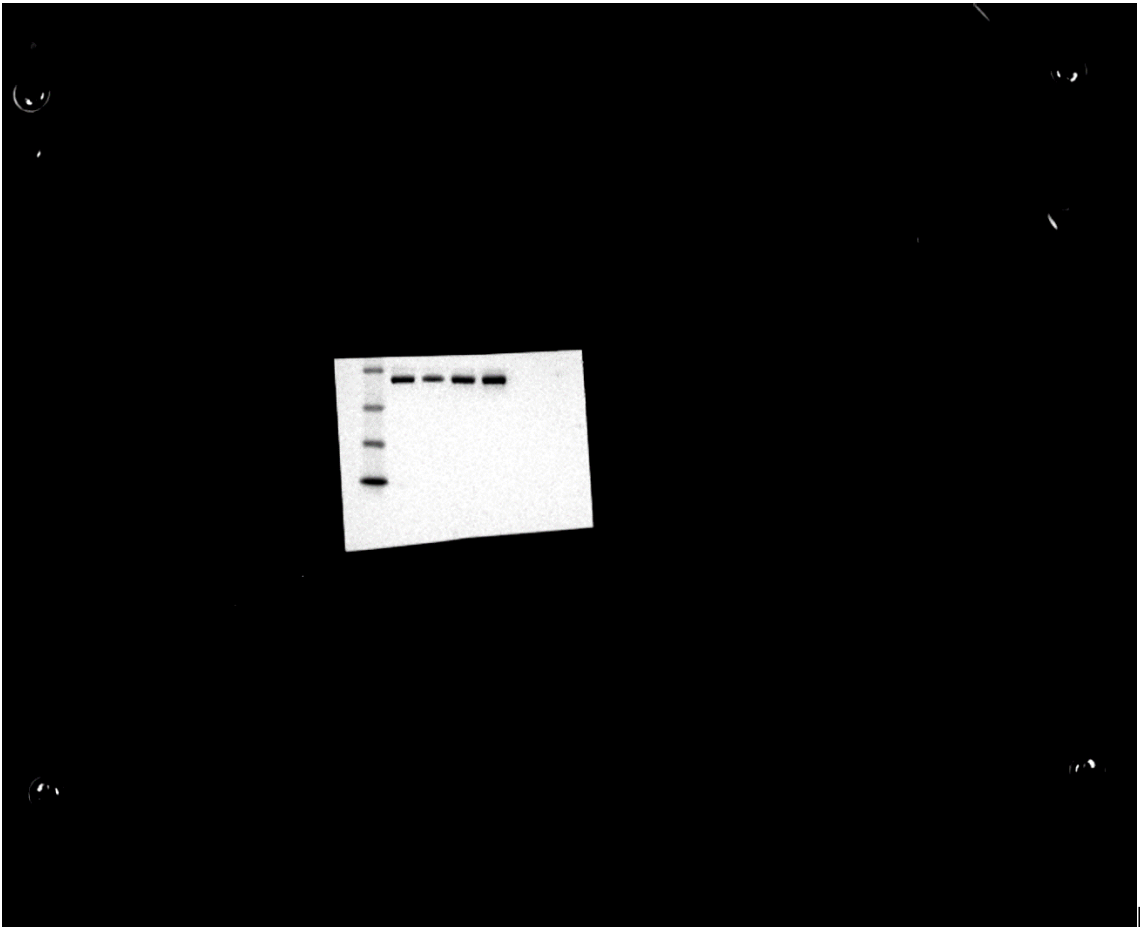

MMP13

Figure S3A :

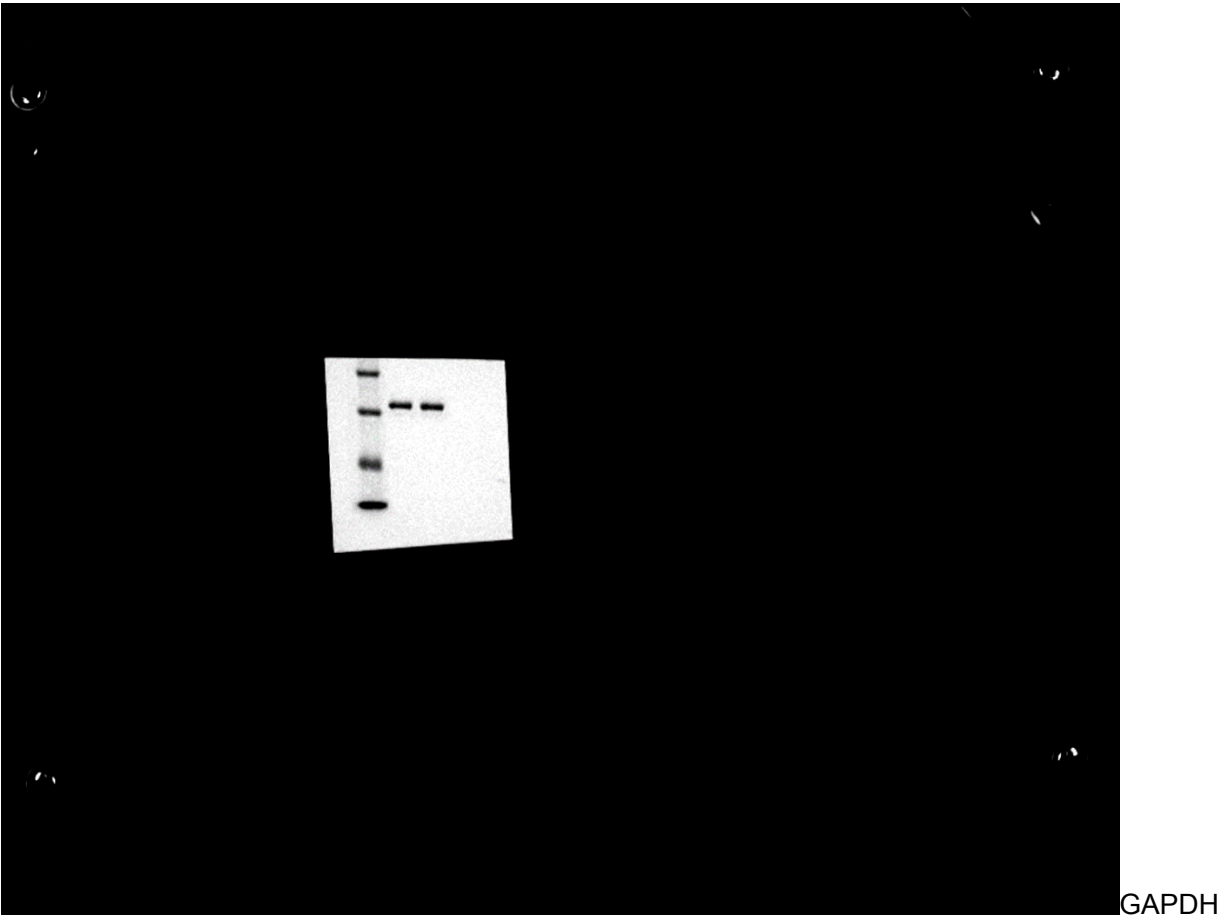

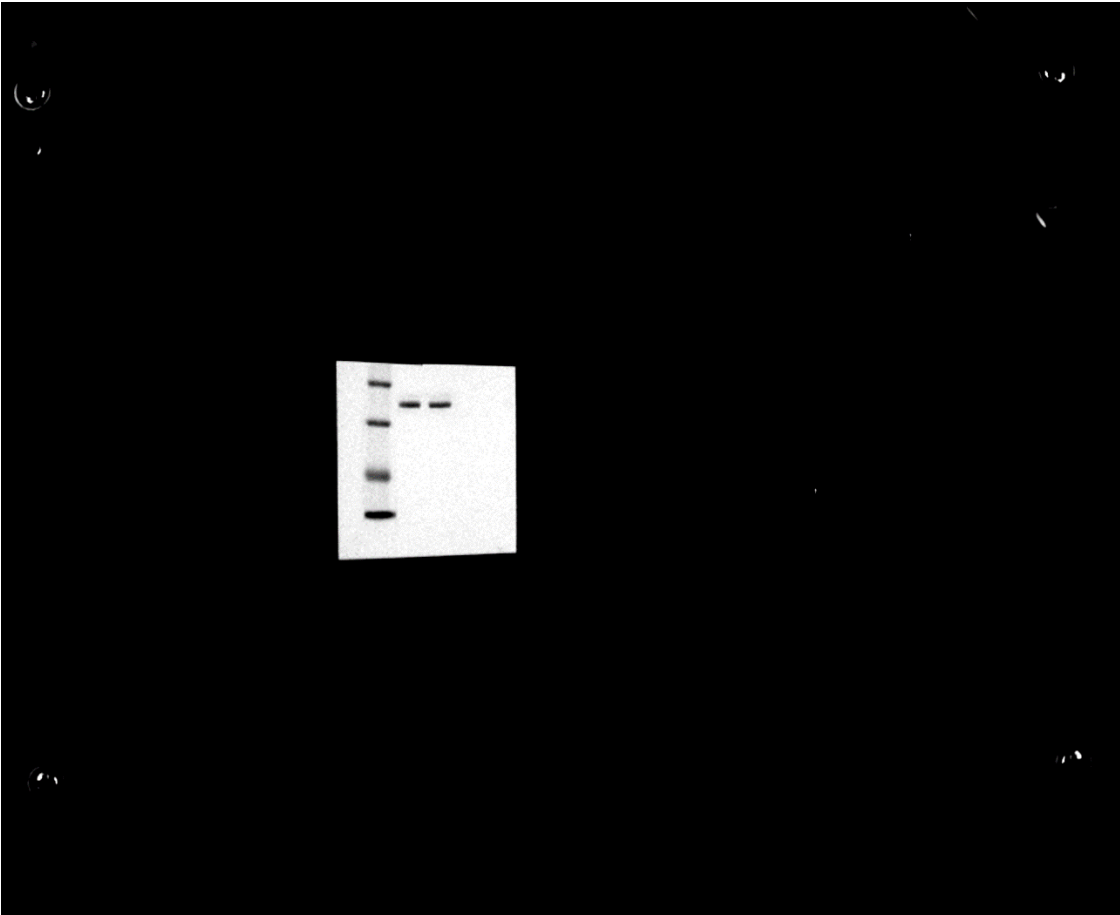

p38

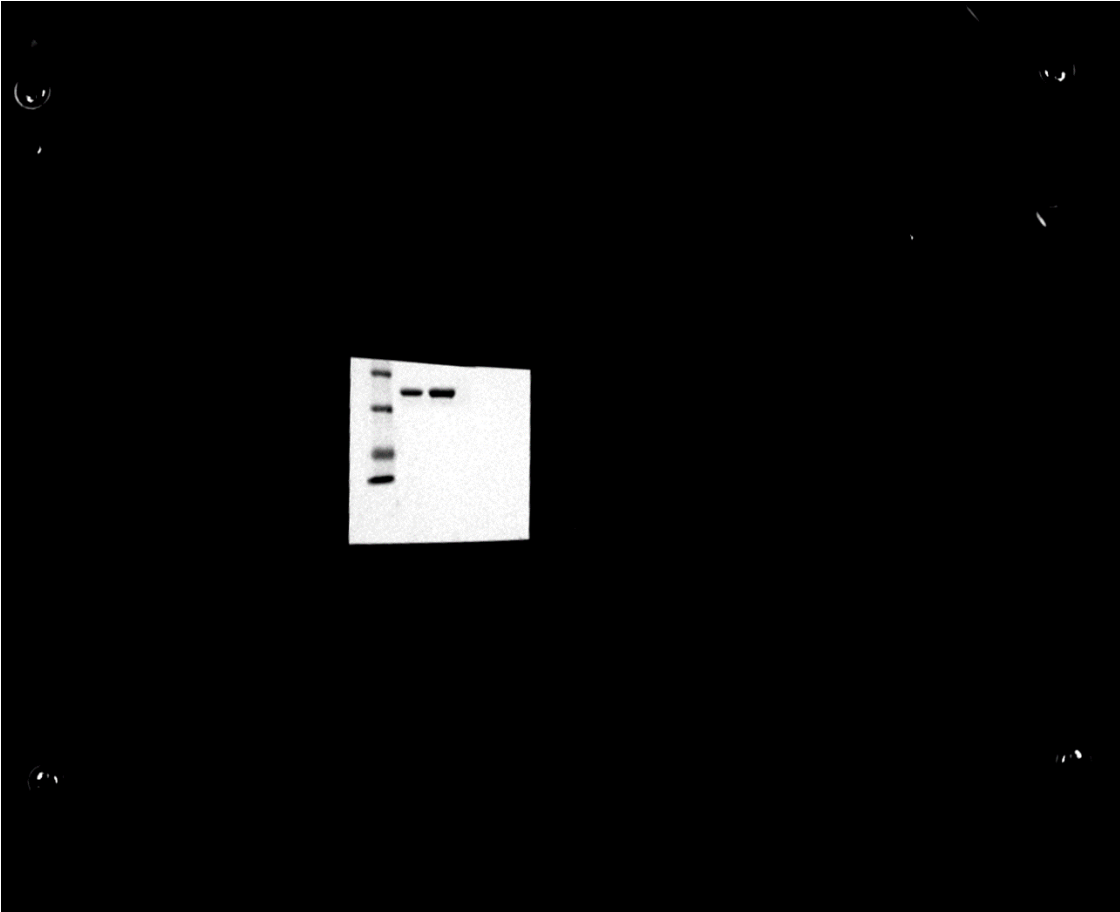

p-p38

Figure S3B :

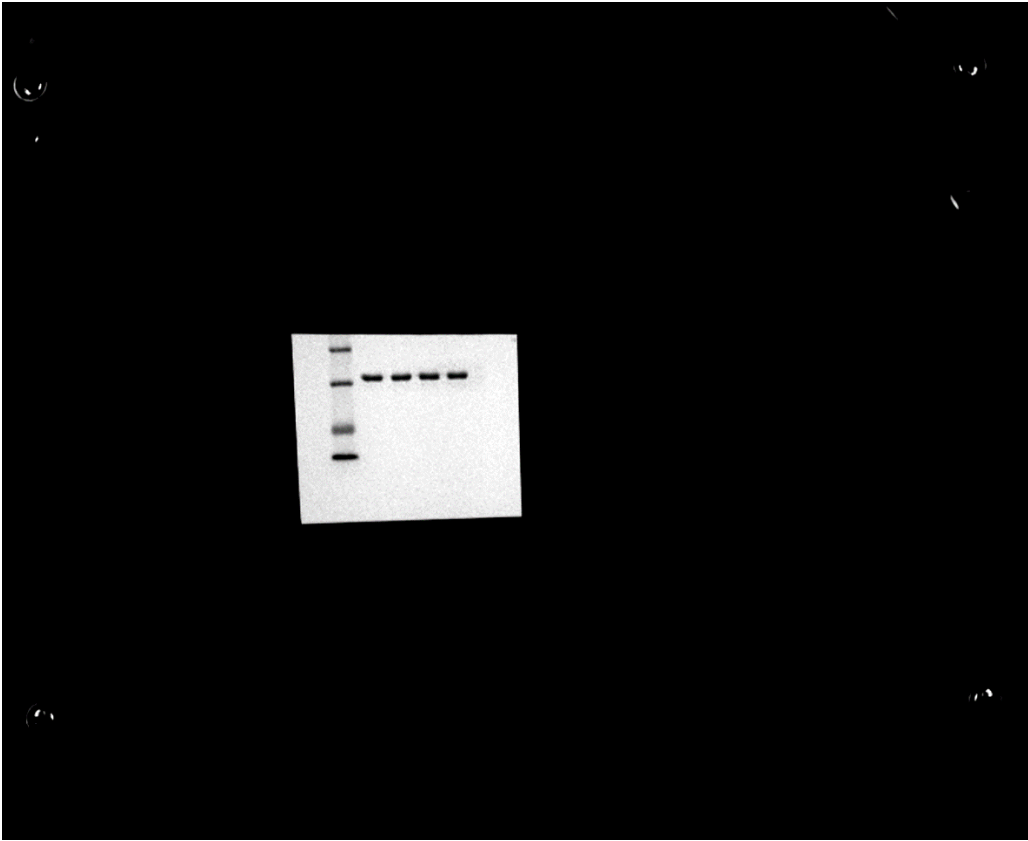

GAPDH

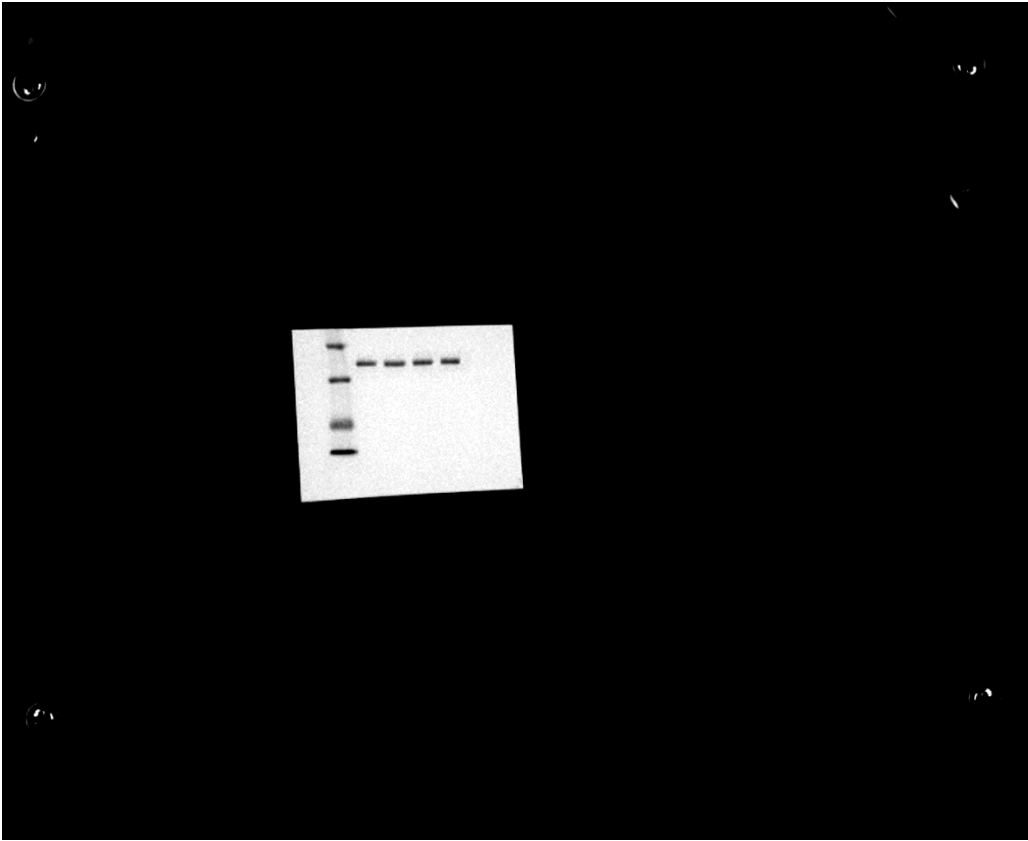

p38

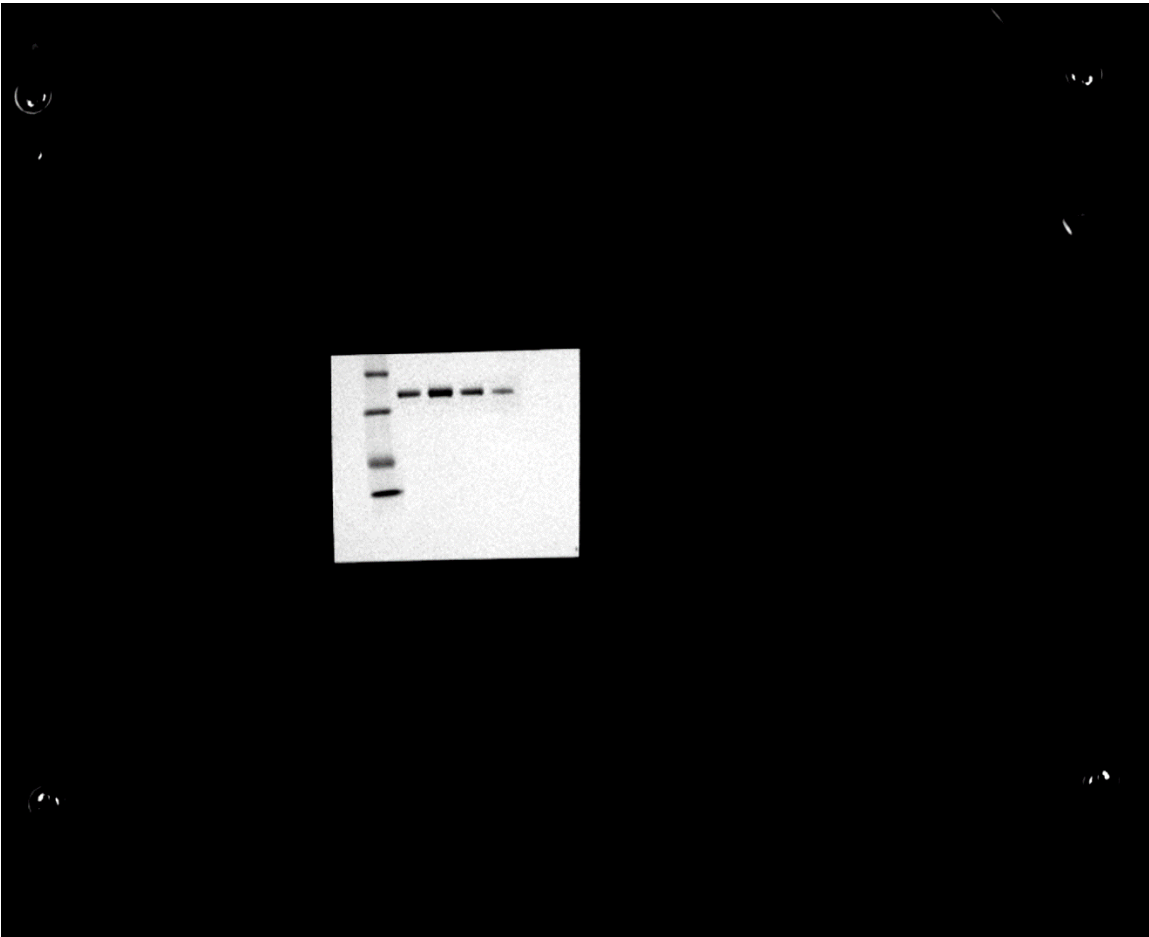

Figure S3D:

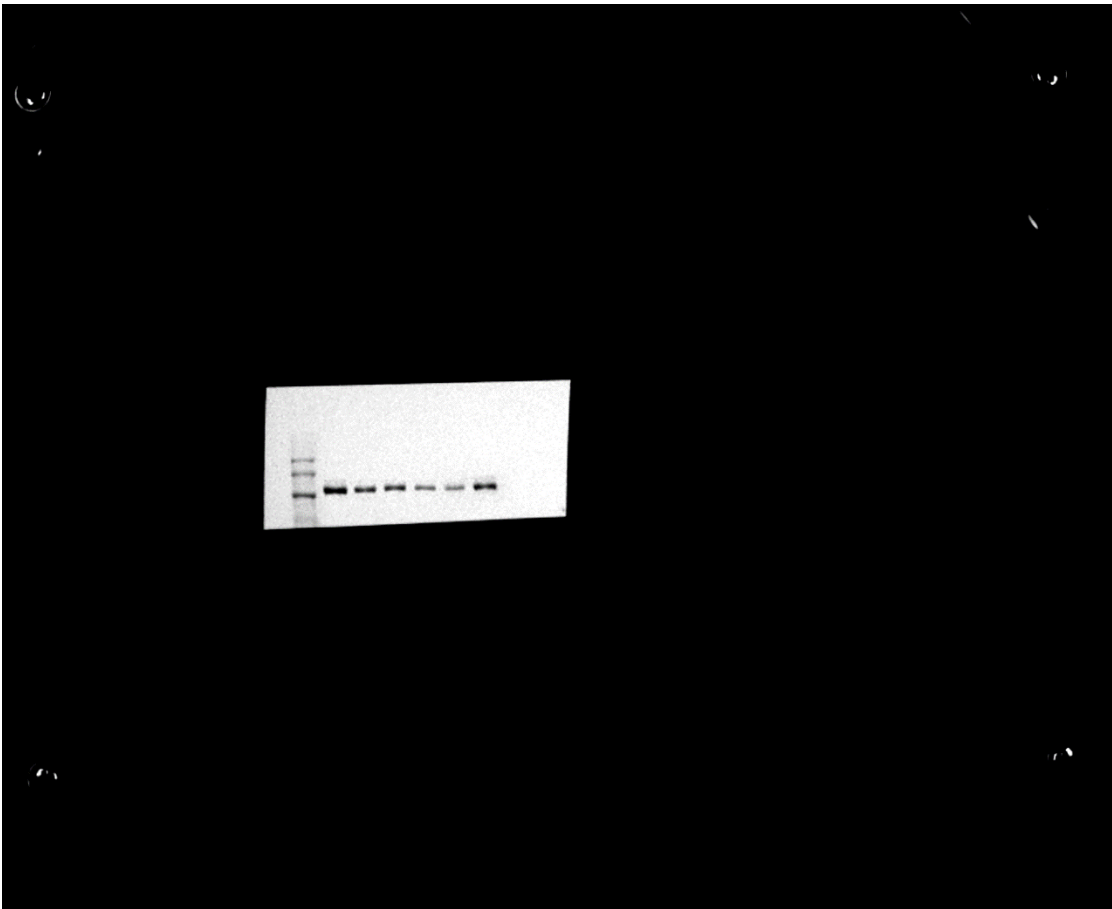

aggrecan



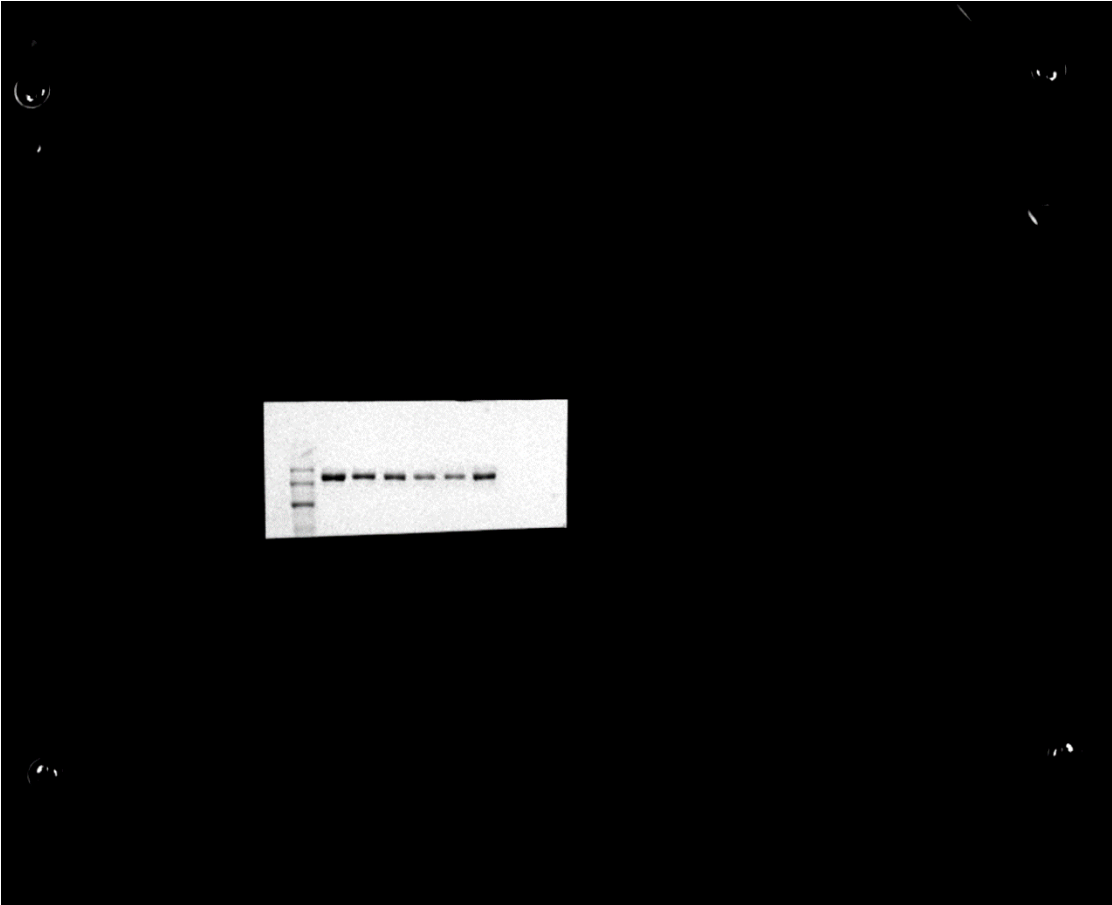

collagen II

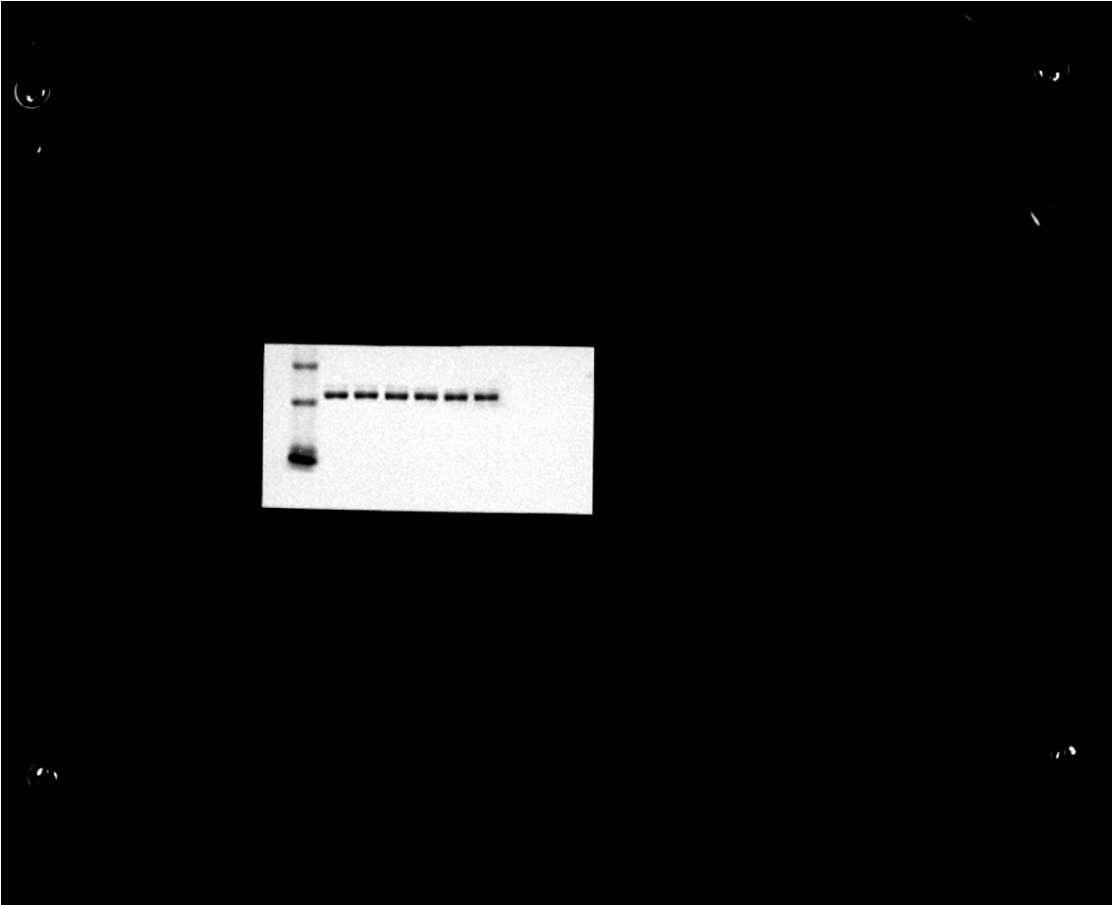

GAPDH

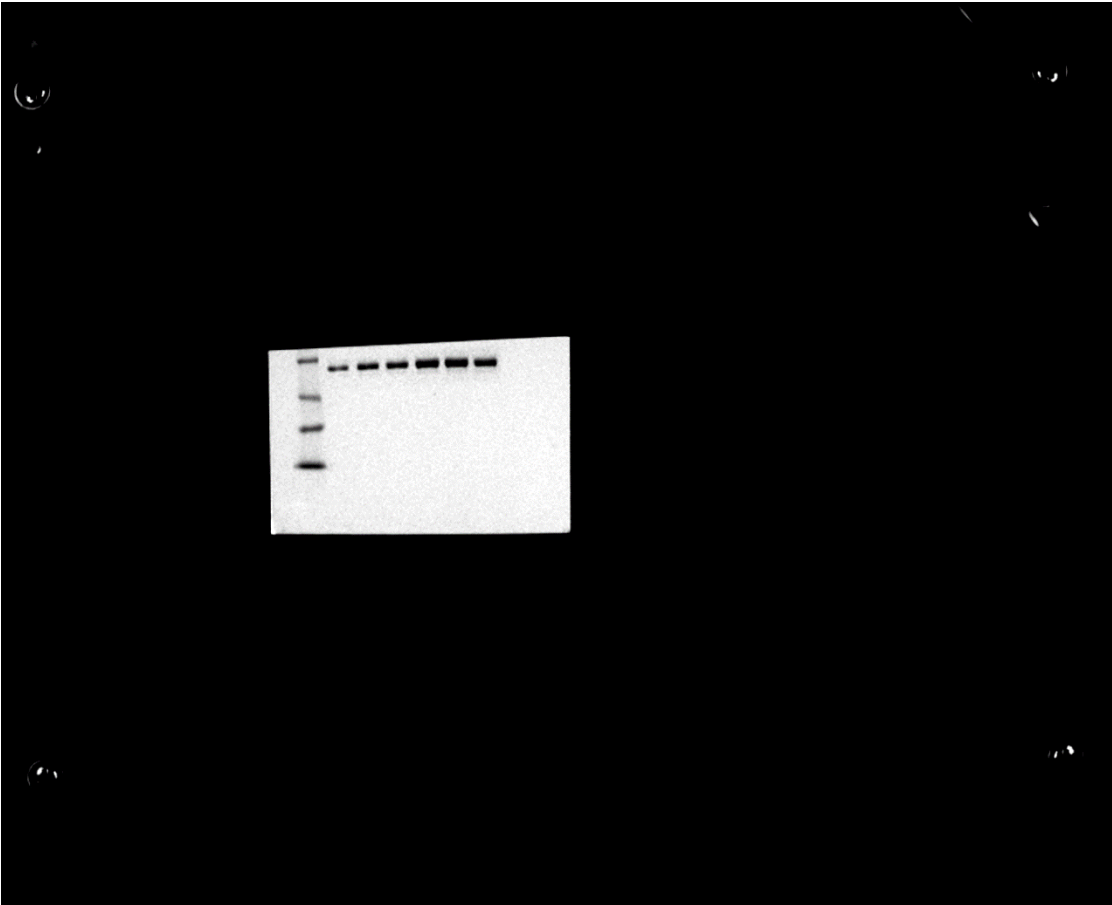

MMP3

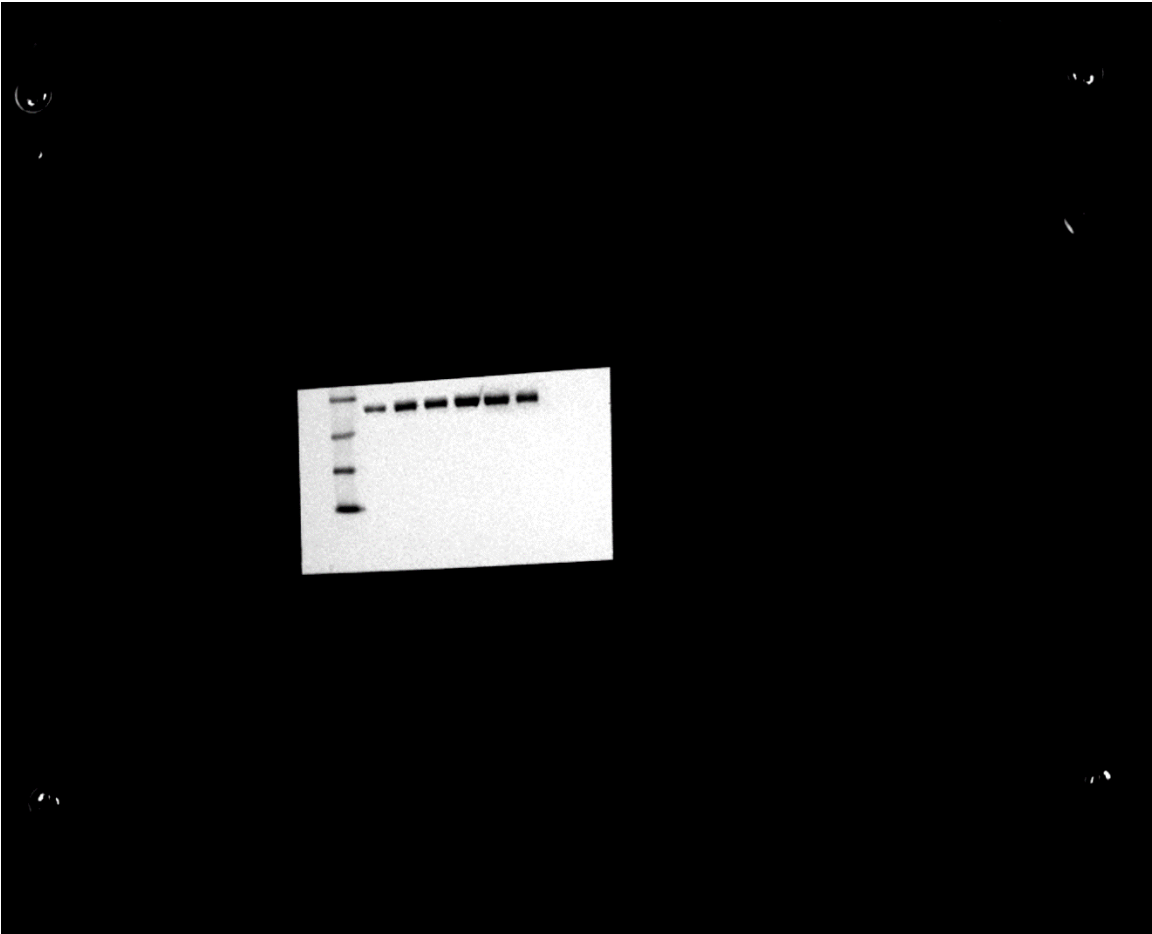

MMP13

Figure S4A:

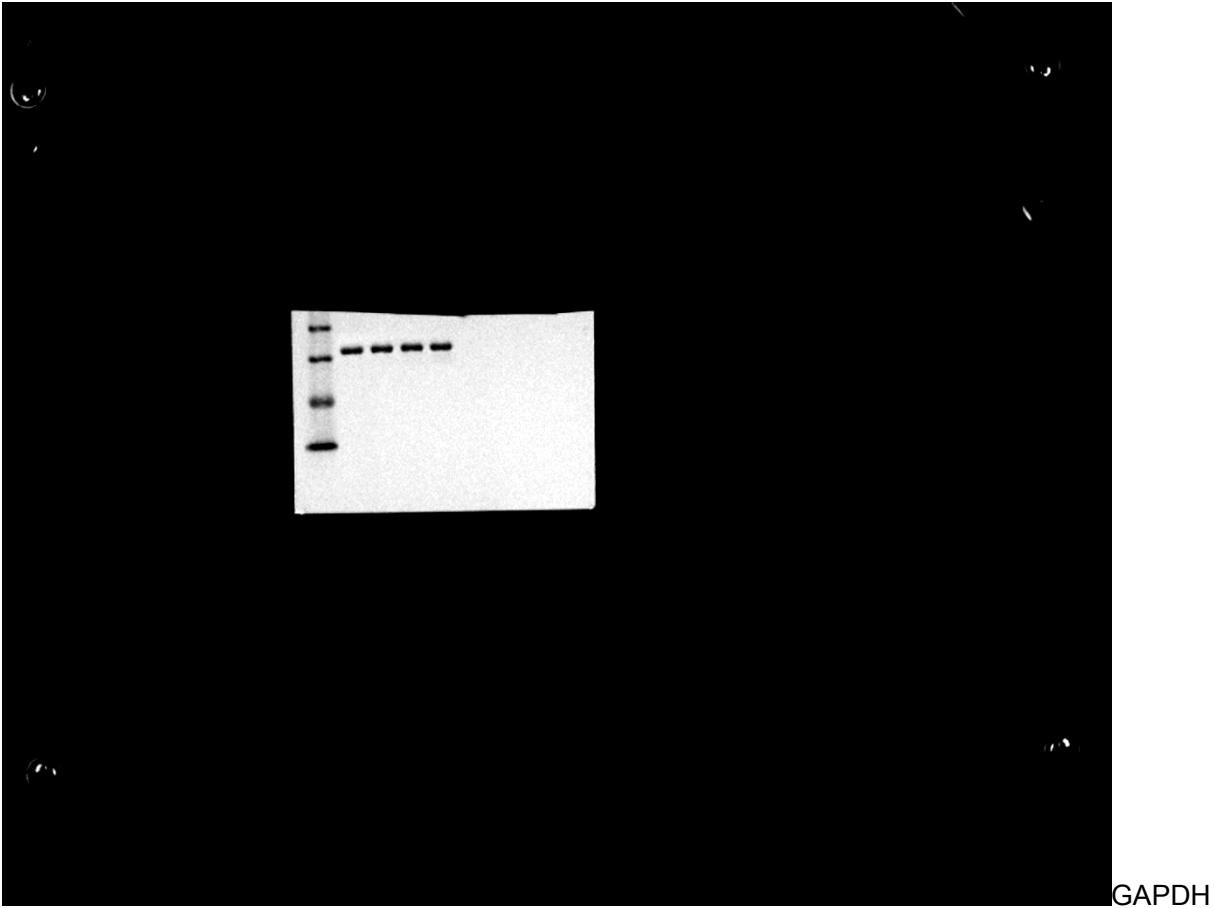

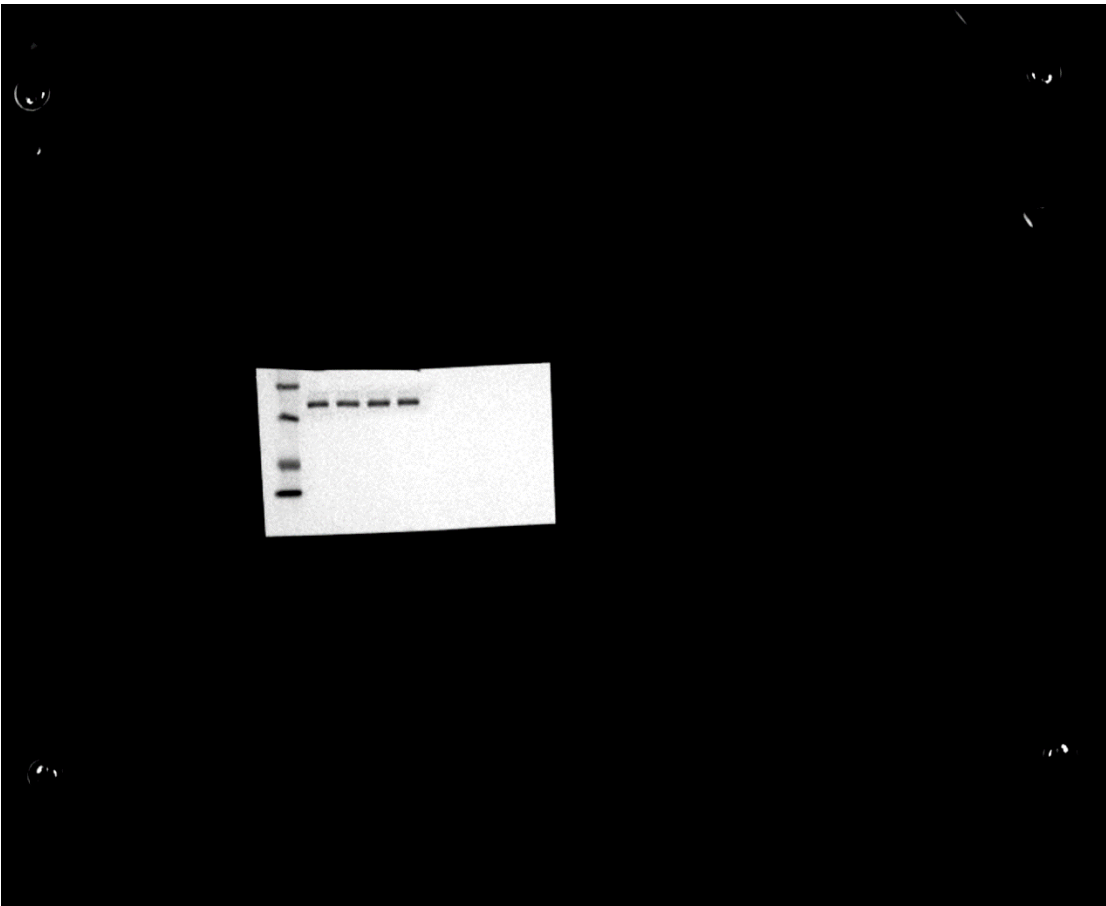

p38

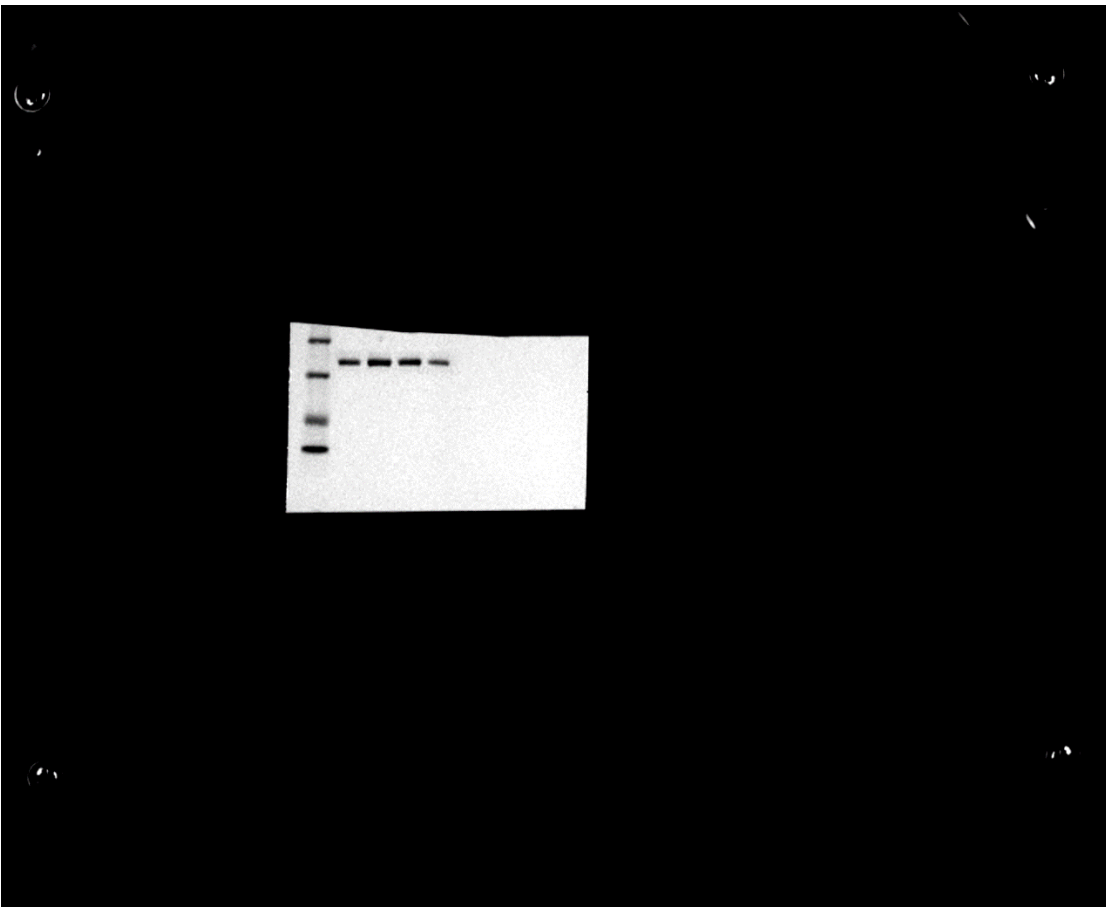

p-p38
